# Supplementary material for: Retinoic acid-stimulated ERK1/2 pathway regulates meiotic initiation in cultured fetal germ cells
Source: PubMed Central journal article supplement (PMC6827903; doi:10.1371/journal.pone.0224628), 2019-11-04
Supplement: pone.0224628.s001.pdf [file pone.0224628.s001.pdf]

**Supplemental Table S1. Antibody Information used for Western Blotting and Immunochemical Staining.**

| Antibody Name                                | Host Organism | Vendor                    | Catalog Number | Dilution Ratio | RRID        |
|----------------------------------------------|---------------|---------------------------|----------------|----------------|-------------|
| Anti-p38 MAPK                                | Rabbit        | Cell Signaling Technology | 9212           | 1:500          | AB_330713   |
| Anti-Phospho-p38 MAPK                        | Rabbit        | Cell Signaling Technology | 4511           | 1:500          | AB_2139682  |
| Anti-p44/42 MAPK (ERK1/2)                    | Rabbit        | Cell Signaling Technology | 4695           | 1:1000         | AB_390779   |
| Anti-Phospho-p44 / 42 MAPK (Thr202 / Tyr204) | Rabbit        | Cell Signaling Technology | 4370           | 1:1000         | AB_2315112  |
| Anti-Akt                                     | Rabbit        | Cell Signaling Technology | 4691           | 1:500          | AB_915783   |
| Anti-Phospho-Akt (Ser473)                    | Rabbit        | Cell Signaling Technology | 4060           | 1:500          | AB_2315049  |
| Anti-SAPK/JNK                                | Rabbit        | Cell Signaling Technology | 9252           | 1:500          | AB_2250373  |
| Anti-Phospho-SAPK/JNK (Thr183/Tyr185)        | Rabbit        | Cell Signaling Technology | 4668P          | 1:500          | AB_10831195 |
| Anti-STRA8                                   | Rabbit        | Abcam                     | ab49405        | 1:500          | AB_945677   |
| Anti- $\gamma$ H2A.X (Ser139)                | Mouse         | Abcam                     | ab22551        | 1:500          | AB_447150   |
| Anti- $\beta$ -Actin                         | Rabbit        | Cell Signaling Technology | 4970           | 1:1000         | AB_2223172  |
| Anti-rabbit IgG HRP-linked                   | Goat          | Cell Signaling Technology | 7074           | 1:1000         | AB_2099233  |
| Anti-mouse IgG, Alexa Fluor 568              | Goat          | Thermo Fisher Scientific  | A-11004        | 1:500          | AB_2534072  |
| Anti-rabbit IgG, Alexa Fluor 568             | Goat          | Thermo Fisher Scientific  | A-11011        | 1:500          | AB_143157   |
