# Supplementary material for: Retinoic acid-stimulated ERK1/2 pathway regulates meiotic initiation in cultured fetal germ cells
Source: PubMed Central journal article supplement (PMC6827903; doi:10.1371/journal.pone.0224628), 2019-11-04
Supplement: pone.0224628.s002.pdf [file pone.0224628.s002.pdf]

## Supplemental Information S2\_Fig. 1A

E11.5-15.5 XX & XY germ cells

### Female

|             | <b>E11.5</b> | <b>E12.5</b> | <b>E13.5</b> | <b>E14.5</b> | <b>E15.5</b> |
|-------------|--------------|--------------|--------------|--------------|--------------|
| <b>1</b>    | 1.45         | 3.05         | 20.09        | 13.02        | 9.18         |
| <b>2</b>    | 0.55         | 4.03         | 7.36         | 12.95        | 6.21         |
| <b>3</b>    | 1.00         | 3.54         | 13.26        | 12.90        | 10.73        |
| <b>Ave.</b> | <b>1.00</b>  | <b>3.54</b>  | <b>13.57</b> | <b>12.96</b> | <b>8.71</b>  |

### Male

|             | <b>E11.5</b> | <b>E12.5</b> | <b>E13.5</b> | <b>E14.5</b> | <b>E15.5</b> |
|-------------|--------------|--------------|--------------|--------------|--------------|
| <b>1</b>    | 0.000        | 0.152        | 0.000        | 0.038        | 1.654        |
| <b>2</b>    | 1.975        | 0.114        | 0.077        | 0.106        | 0.000        |
| <b>3</b>    | 1.025        | 0.114        | 0.000        | 0.000        | 0.165        |
| <b>Ave.</b> | <b>1.00</b>  | <b>0.13</b>  | <b>0.03</b>  | <b>0.05</b>  | <b>0.61</b>  |
