# Supplementary material for: Retinoic acid-stimulated ERK1/2 pathway regulates meiotic initiation in cultured fetal germ cells
Source: PubMed Central journal article supplement (PMC6827903; doi:10.1371/journal.pone.0224628), 2019-11-04
Supplement: pone.0224628.s003.pdf [file pone.0224628.s003.pdf]

### S3 Table\_Fig. 2A

E12.5 XX germ cells (1 h)

|             | <b>Control</b> | <b>U0126 (10 <math>\mu</math>M)</b> | <b>U0126 (20 <math>\mu</math>M)</b> | <b>U0126 (50 <math>\mu</math>M)</b> |
|-------------|----------------|-------------------------------------|-------------------------------------|-------------------------------------|
| <b>1</b>    | 0.83           | 0.36                                | 0.26                                | 0.19                                |
| <b>2</b>    | 1.17           | 0.42                                | 0.29                                | 0.22                                |
| <b>3</b>    | 1.00           | 0.39                                | 0.21                                | 0.15                                |
| <b>Ave.</b> | <b>1.00</b>    | <b>0.39</b>                         | <b>0.25</b>                         | <b>0.19</b>                         |
