# Supplementary material for: Retinoic acid-stimulated ERK1/2 pathway regulates meiotic initiation in cultured fetal germ cells
Source: PubMed Central journal article supplement (PMC6827903; doi:10.1371/journal.pone.0224628), 2019-11-04
Supplement: pone.0224628.s004.pdf [file pone.0224628.s004.pdf]

### S4 Table\_Fig. 3A

E12.5 XX gonads (24 & 48h)

#### *Stra8*

|             | D1          |             | D2          |             |
|-------------|-------------|-------------|-------------|-------------|
|             | Control     | U0126       | Control     | U0126       |
| <b>1</b>    | 0.80        | 0.59        | 1.27        | 1.10        |
| <b>2</b>    | 1.16        | 0.92        | 1.14        | 1.16        |
| <b>3</b>    | 1.04        | 0.60        | 2.48        | 1.99        |
| <b>Ave.</b> | <b>1.00</b> | <b>0.70</b> | <b>1.63</b> | <b>1.42</b> |

#### *Rec8*

|             | D1          |             | D2          |             |
|-------------|-------------|-------------|-------------|-------------|
|             | Control     | U0126       | Control     | U0126       |
| <b>1</b>    | 1.18        | 1.00        | 3.73        | 1.91        |
| <b>2</b>    | 0.36        | 0.18        | 6.82        | 0.09        |
| <b>3</b>    | 1.45        | 0.82        | 7.64        | 4.18        |
| <b>Ave.</b> | <b>1.00</b> | <b>0.67</b> | <b>6.06</b> | <b>2.06</b> |

#### *Spo11*

|             | D1          |             | D2          |             |
|-------------|-------------|-------------|-------------|-------------|
|             | Control     | U0126       | Control     | U0126       |
| <b>1</b>    | 1.12        | 0.00        | 3.60        | 0.00        |
| <b>2</b>    | 0.34        | 0.00        | 9.74        | 0.00        |
| <b>3</b>    | 1.54        | 0.00        | 3.85        | 0.00        |
| <b>Ave.</b> | <b>1.00</b> | <b>0.00</b> | <b>5.73</b> | <b>0.00</b> |

#### *Dmc1*

|             | D1          |             | D2          |             |
|-------------|-------------|-------------|-------------|-------------|
|             | Control     | U0126       | Control     | U0126       |
| <b>1</b>    | 1.04        | 0.41        | 4.48        | 0.58        |
| <b>2</b>    | 1.24        | 1.04        | 4.01        | 1.86        |
| <b>3</b>    | 0.73        | 0.09        | 3.91        | 0.33        |
| <b>Ave.</b> | <b>1.00</b> | <b>0.51</b> | <b>4.13</b> | <b>0.92</b> |

#### *Sycp3*

|             | D1          |             | D2          |             |
|-------------|-------------|-------------|-------------|-------------|
|             | Control     | U0126       | Control     | U0126       |
| <b>1</b>    | 0.87        | 0.48        | 1.64        | 0.76        |
| <b>2</b>    | 1.21        | 0.90        | 1.87        | 1.17        |
| <b>3</b>    | 0.93        | 0.51        | 1.56        | 0.93        |
| <b>Ave.</b> | <b>1.00</b> | <b>0.63</b> | <b>1.69</b> | <b>0.95</b> |
