# Supplementary material for: Retinoic acid-stimulated ERK1/2 pathway regulates meiotic initiation in cultured fetal germ cells
Source: PubMed Central journal article supplement (PMC6827903; doi:10.1371/journal.pone.0224628), 2019-11-04
Supplement: pone.0224628.s005.pdf [file pone.0224628.s005.pdf]

**S5 Table\_Fig. 3B**

E12.5 XX germ cells (24 &amp; 48h)

***Stra8***

|            | D1          |             |             |             | D2          |             |             |             |
|------------|-------------|-------------|-------------|-------------|-------------|-------------|-------------|-------------|
|            | Ctrl        | RA          | RA+U0126    | U0126       | Ctrl        | RA          | RA+U0126    | U0126       |
| 1          | 1.29        | 3.32        | 2.71        | 0.27        | 2.64        | 8.12        | 2.34        | 0.52        |
| 2          | 1.13        | 3.63        | 2.38        | 0.37        | 2.78        | 11.42       | 3.35        | 0.50        |
| 3          | 0.44        | 3.68        | 2.45        | 0.16        | 2.01        | 7.66        | 2.22        | 0.17        |
| 4          | 1.14        | 3.46        | 3.30        | 0.32        | 1.65        | 7.68        | 2.06        | 0.10        |
| <b>Ave</b> | <b>1.00</b> | <b>3.52</b> | <b>2.71</b> | <b>0.28</b> | <b>2.27</b> | <b>8.72</b> | <b>2.49</b> | <b>0.32</b> |

***Rec8***

|             | D1          |             |             |             | D2          |             |             |             |
|-------------|-------------|-------------|-------------|-------------|-------------|-------------|-------------|-------------|
|             | Ctrl        | RA          | RA+U0126    | U0126       | Ctrl        | RA          | RA+U0126    | U0126       |
| 1           | 1.09        | 1.05        | 0.96        | 0.13        | 0.99        | 1.93        | 0.41        | 0.37        |
| 2           | 0.73        | 1.84        | 0.80        | 0.29        | 1.10        | 4.47        | 0.93        | 1.00        |
| 3           | 1.24        | 1.36        | 0.84        | 0.27        | 2.14        | 5.73        | 1.01        | 0.44        |
| 4           | 0.95        | 1.40        | 0.97        | 0.43        | 0.42        | 4.28        | 0.35        | 0.28        |
| <b>Ave.</b> | <b>1.00</b> | <b>1.41</b> | <b>0.89</b> | <b>0.28</b> | <b>1.16</b> | <b>4.10</b> | <b>0.67</b> | <b>0.52</b> |

***Spo11***

|             | D1          |             |             |             | D2          |              |             |             |
|-------------|-------------|-------------|-------------|-------------|-------------|--------------|-------------|-------------|
|             | Ctrl        | RA          | RA+U0126    | U0126       | Ctrl        | RA           | RA+U0126    | U0126       |
| 1           | 1.23        | 1.96        | 0.00        | 0.00        | 7.62        | 26.14        | 3.60        | 4.22        |
| 2           | 1.06        | 0.95        | 0.37        | 0.01        | 7.64        | 24.95        | 1.88        | 1.94        |
| 3           | 0.16        | 3.83        | 0.91        | 0.00        | 5.50        | 10.07        | 1.72        | 0.12        |
| 4           | 1.55        | 0.04        | 0.01        | 0.06        | 5.47        | 16.57        | 3.97        | 3.02        |
| <b>Ave.</b> | <b>1.00</b> | <b>1.70</b> | <b>0.32</b> | <b>0.02</b> | <b>6.56</b> | <b>19.43</b> | <b>2.79</b> | <b>2.33</b> |
