# Supplementary material for: Retinoic acid-stimulated ERK1/2 pathway regulates meiotic initiation in cultured fetal germ cells
Source: PubMed Central journal article supplement (PMC6827903; doi:10.1371/journal.pone.0224628), 2019-11-04
Supplement: pone.0224628.s006.pdf [file pone.0224628.s006.pdf]

**S6 Table\_Fig. 4B**

E12.5 XX germ cells (24h)

| 1st      | Hoechst | STRA8-positive | Stra8-negative | % of STRA8-positive cells | % of STRA8-negative cells |
|----------|---------|----------------|----------------|---------------------------|---------------------------|
| Control  | 102     | 56             | 46             | 54.9                      | 45.1                      |
| RA       | 105     | 59             | 46             | 56.2                      | 43.8                      |
| RA+U0126 | 87      | 33             | 54             | 37.9                      | 62.1                      |
| U0126    | 28      | 5              | 23             | 17.9                      | 82.1                      |

| 2nd      | Hoechst | STRA8-positive | Stra8-negative | % of STRA8-positive cells | % of STRA8-negative cells |
|----------|---------|----------------|----------------|---------------------------|---------------------------|
| Control  | 100     | 58             | 42             | 58.0                      | 42.0                      |
| RA       | 98      | 60             | 38             | 61.2                      | 38.8                      |
| RA+U0126 | 86      | 30             | 56             | 34.9                      | 65.1                      |
| U0126    | 80      | 12             | 68             | 15.0                      | 85.0                      |

| 3rd      | Hoechst | STRA8-positive | Stra8-negative | % of STRA8-positive cells | % of STRA8-negative cells |
|----------|---------|----------------|----------------|---------------------------|---------------------------|
| Control  | 90      | 50             | 40             | 55.6                      | 44.4                      |
| RA       | 85      | 50             | 35             | 58.8                      | 41.2                      |
| RA+U0126 | 80      | 28             | 52             | 35.0                      | 65.0                      |
| U0126    | 85      | 13             | 72             | 15.3                      | 84.7                      |

| Total    | Hoechst | STRA8-positive | Stra8-negative | % of STRA8-positive cells | % of STRA8-negative cells |
|----------|---------|----------------|----------------|---------------------------|---------------------------|
| Control  | 292     | 164            | 128            | 56.2                      | 43.8                      |
| RA       | 288     | 169            | 119            | 58.7                      | 41.3                      |
| RA+U0126 | 253     | 91             | 162            | 36.0                      | 64.0                      |
| U0126    | 193     | 30             | 163            | 15.5                      | 84.5                      |
