# Supplementary material for: Retinoic acid-stimulated ERK1/2 pathway regulates meiotic initiation in cultured fetal germ cells
Source: PubMed Central journal article supplement (PMC6827903; doi:10.1371/journal.pone.0224628), 2019-11-04
Supplement: pone.0224628.s007.pdf [file pone.0224628.s007.pdf]

**S7 Table Fig. 4C**

E12.5 XX germ cells (24h)

| Cell # | Control | RA    | RA+U0126 | U0126 | Control | RA    | RA+U0126 | U0126 | Control | RA    | RA+U0126 | U0126 |
|--------|---------|-------|----------|-------|---------|-------|----------|-------|---------|-------|----------|-------|
| 1      | 76      | 74    | 68       | 24    | 41      | 77    | 42       | 10    | 26      | 82    | 17       | 14    |
| 2      | 56      | 81    | 56       | 19    | 33      | 81    | 13       | 25    | 28      | 86    | 14       | 23    |
| 3      | 39      | 77    | 33       | 22    | 30      | 76    | 28       | 15    | 26      | 90    | 16       | 28    |
| 4      | 43      | 78    | 32       | 21    | 32      | 72    | 23       | 0     | 27      | 87    | 30       | 0     |
| 5      | 52      | 73    | 38       | 18    | 36      | 72    | 27       | 0     | 26      | 91    | 18       | 0     |
| 6      | 62      | 64    | 66       | 0     | 26      | 93    | 16       | 0     | 45      | 85    | 16       | 0     |
| 7      | 77      | 40    | 35       | 0     | 60      | 88    | 13       | 0     | 52      | 70    | 44       | 0     |
| 8      | 57      | 48    | 40       | 0     | 28      | 74    | 63       | 0     | 42      | 61    | 17       | 0     |
| 9      | 68      | 49    | 36       | 0     | 36      | 55    | 27       | 0     | 26      | 57    | 14       | 0     |
| 10     | 54      | 77    | 64       | 0     | 29      | 57    | 43       | 0     | 27      | 56    | 27       | 0     |
| 11     | 36      | 49    | 36       |       | 28      | 91    | 43       |       | 46      | 56    | 42       |       |
| 12     | 68      | 60    | 65       |       | 28      | 84    | 14       |       | 29      | 59    | 13       |       |
| 13     | 62      | 68    | 66       |       | 26      | 88    | 40       |       | 31      | 58    | 13       |       |
| 14     | 58      | 64    | 52       |       | 26      | 57    | 13       |       | 32      | 58    | 13       |       |
| 15     | 68      | 66    | 38       |       | 26      | 57    | 13       |       | 27      | 60    | 15       |       |
| 16     | 53      | 74    | 35       |       | 30      | 89    | 13       |       | 30      | 59    | 13       |       |
| 17     | 69      | 76    | 43       |       | 26      | 85    | 14       |       | 33      | 58    | 13       |       |
| 18     | 46      | 70    | 31       |       | 26      | 55    | 13       |       | 26      | 79    | 26       |       |
| 19     | 65      | 81    | 30       |       | 27      | 58    | 13       |       | 26      | 55    | 13       |       |
| 20     | 64      | 78    | 39       |       | 26      | 57    | 52       |       | 26      | 59    | 13       |       |
| 21     | 68      | 82    | 39       |       | 43      | 55    | 68       |       | 26      | 73    | 19       |       |
| 22     | 67      | 72    | 55       |       | 27      | 73    | 15       |       | 27      | 56    | 26       |       |
| 23     | 59      | 82    | 27       |       | 26      | 58    | 19       |       | 26      | 55    | 17       |       |
| 24     | 26      | 82    | 44       |       | 26      | 61    | 18       |       | 27      | 60    | 44       |       |
| 25     | 42      | 42    | 17       |       | 36      | 58    | 14       |       | 26      | 80    | 14       |       |
| 26     | 42      | 40    | 15       |       | 26      | 55    | 14       |       | 28      | 87    | 15       |       |
| 27     | 26      | 44    | 31       |       | 27      | 62    | 30       |       | 41      | 86    |          |       |
| 28     | 39      | 53    |          |       | 26      | 57    |          |       | 27      | 58    |          |       |
| 29     | 33      | 70    |          |       | 27      | 56    |          |       | 49      | 58    |          |       |
| 30     | 39      | 70    |          |       | 26      | 55    |          |       | 26      | 55    |          |       |
| 31     | 26      | 47    |          |       | 26      | 55    |          |       | 26      | 62    |          |       |
| 32     | 26      | 52    |          |       | 27      | 91    |          |       | 26      | 74    |          |       |
| 33     | 27      | 72    |          |       | 26      | 87    |          |       | 32      | 56    |          |       |
| 34     | 27      | 76    |          |       | 39      | 63    |          |       | 26      | 57    |          |       |
| 35     | 26      | 76    |          |       | 26      | 73    |          |       | 26      | 55    |          |       |
| 36     | 46      | 40    |          |       | 42      | 57    |          |       | 26      | 85    |          |       |
| 37     | 26      | 66    |          |       | 26      | 86    |          |       | 26      | 55    |          |       |
| 38     | 26      | 56    |          |       | 43      | 76    |          |       | 26      | 76    |          |       |
| 39     | 26      | 82    |          |       | 26      | 73    |          |       | 26      | 72    |          |       |
| 40     | 32      | 60    |          |       | 26      | 76    |          |       | 26      | 59    |          |       |
| 41     | 50      | 67    |          |       | 26      | 57    |          |       | 41      | 60    |          |       |
| 42     | 26      | 55    |          |       | 26      | 82    |          |       | 26      | 75    |          |       |
| 43     | 42      |       |          |       | 29      |       |          |       | 27      |       |          |       |
| 44     | 26      |       |          |       | 26      |       |          |       | 35      |       |          |       |
| 45     | 42      |       |          |       | 34      |       |          |       | 45      |       |          |       |
| 46     | 27      |       |          |       | 26      |       |          |       | 28      |       |          |       |
| 47     | 26      |       |          |       | 26      |       |          |       | 48      |       |          |       |
| 48     | 36      |       |          |       | 26      |       |          |       | 26      |       |          |       |
| 49     | 26      |       |          |       | 54      |       |          |       | 45      |       |          |       |
| 50     | 29      |       |          |       | 27      |       |          |       | 26      |       |          |       |
| 51     | 26      |       |          |       | 26      |       |          |       | 26      |       |          |       |
| 52     | 26      |       |          |       | 28      |       |          |       | 46      |       |          |       |
| 53     | 26      |       |          |       | 33      |       |          |       | 32      |       |          |       |
| 54     | 46      |       |          |       | 26      |       |          |       | 27      |       |          |       |
| 55     | 26      |       |          |       | 27      |       |          |       | 26      |       |          |       |
| 56     | 35      |       |          |       | 39      |       |          |       | 26      |       |          |       |
| 57     | 26      |       |          |       | 27      |       |          |       | 26      |       |          |       |
| Ave.   | 42.86   | 65.07 | 41.89    | 10.40 | 30.23   | 69.81 | 25.96    | 5.00  | 30.81   | 67.14 | 20.08    | 6.50  |
