# Supplementary material for: Retinoic acid-stimulated ERK1/2 pathway regulates meiotic initiation in cultured fetal germ cells
Source: PubMed Central journal article supplement (PMC6827903; doi:10.1371/journal.pone.0224628), 2019-11-04
Supplement: pone.0224628.s008.pdf [file pone.0224628.s008.pdf]

**S8 Table\_Fig. 4E**

E12.5 XX germ cells (24h)

| <b>1st</b> | <b>Hoechst</b> | <b><math>\gamma</math>H2AX-positive</b> | <b><math>\gamma</math>H2AX-negative</b> | <b>% of <math>\gamma</math>H2AX-positive cells</b> |
|------------|----------------|-----------------------------------------|-----------------------------------------|----------------------------------------------------|
| Control    | 52             | 36                                      | 16                                      | 69.2                                               |
| RA         | 39             | 28                                      | 11                                      | 71.8                                               |
| RA+U0126   | 62             | 18                                      | 44                                      | 29.0                                               |
| U0126      | 30             | 4                                       | 26                                      | 13.3                                               |

| <b>2nd</b> | <b>Hoechst</b> | <b><math>\gamma</math>H2AX-positive</b> | <b><math>\gamma</math>H2AX-negative</b> | <b>% of <math>\gamma</math>H2AX-positive cells</b> |
|------------|----------------|-----------------------------------------|-----------------------------------------|----------------------------------------------------|
| Control    | 44             | 24                                      | 20                                      | 54.5                                               |
| RA         | 39             | 24                                      | 15                                      | 61.5                                               |
| RA+U0126   | 45             | 7                                       | 38                                      | 15.6                                               |
| U0126      | 32             | 3                                       | 29                                      | 9.4                                                |

| <b>Total</b> | <b>Hoechst</b> | <b><math>\gamma</math>H2AX-positive</b> | <b><math>\gamma</math>H2AX-negative</b> | <b>% of <math>\gamma</math>H2AX-positive cells</b> |
|--------------|----------------|-----------------------------------------|-----------------------------------------|----------------------------------------------------|
| Control      | 96             | 60                                      | 36                                      | 62.5                                               |
| RA           | 78             | 52                                      | 26                                      | 66.7                                               |
| RA+U0126     | 107            | 25                                      | 82                                      | 23.4                                               |
| U0126        | 62             | 7                                       | 55                                      | 11.3                                               |

---

| <b>% of <math>\gamma</math>H2AX-negative cells</b> |
|----------------------------------------------------|
| 30.8                                               |
| 28.2                                               |
| 71.0                                               |
| 86.7                                               |

---

---

| <b>% of <math>\gamma</math>H2AX-negative cells</b> |
|----------------------------------------------------|
| 45.5                                               |
| 38.5                                               |
| 84.4                                               |
| 90.6                                               |

---

---

| <b>% of <math>\gamma</math>H2AX-negative cells</b> |
|----------------------------------------------------|
| 37.5                                               |
| 33.3                                               |
| 76.6                                               |
| 88.7                                               |

---
