# Supplementary material for: Retinoic acid-stimulated ERK1/2 pathway regulates meiotic initiation in cultured fetal germ cells
Source: PubMed Central journal article supplement (PMC6827903; doi:10.1371/journal.pone.0224628), 2019-11-04
Supplement: pone.0224628.s009.pdf [file pone.0224628.s009.pdf]

**S9 Table\_Fig. 5C**

E13.5 XY germ cells (48 &amp; 72h)

***Stra8***

|             | D2          |             |             |             | D3          |             |             |             |
|-------------|-------------|-------------|-------------|-------------|-------------|-------------|-------------|-------------|
|             | Ctrl        | RA          | RA+U0126    | U0126       | Ctrl        | RA          | RA+U0126    | U0126       |
| 1           | 2.95        | 4.87        | 4.39        | 0.00        | 0.50        | 6.55        | 1.10        | 0.01        |
| 2           | 0.62        | 4.86        | 3.25        | 0.11        | 0.71        | 7.73        | 2.25        | 0.04        |
| 3           | 0.73        | 5.64        | 3.41        | 0.22        | 0.39        | 2.93        | 0.30        | 0.00        |
| 4           | 0.36        | 9.91        | 3.77        | 0.00        |             |             |             |             |
| 5           | 0.67        | 5.38        | 1.21        | 0.03        |             |             |             |             |
| 6           | 0.67        | 1.64        | 0.56        | 0.00        |             |             |             |             |
| <b>Ave.</b> | <b>1.00</b> | <b>5.38</b> | <b>2.76</b> | <b>0.06</b> | <b>0.54</b> | <b>5.74</b> | <b>1.22</b> | <b>0.02</b> |

***Rec8***

|             | D2          |             |             |             | D3          |             |             |             |
|-------------|-------------|-------------|-------------|-------------|-------------|-------------|-------------|-------------|
|             | Ctrl        | RA          | RA+U0126    | U0126       | Ctrl        | RA          | RA+U0126    | U0126       |
| 1           | 1.80        | 4.61        | 3.98        | 1.02        | 0.98        | 5.01        | 2.13        | 2.40        |
| 2           | 0.74        | 1.76        | 1.92        | 0.81        | 0.51        | 1.86        | 0.85        | 0.52        |
| 3           | 0.46        | 1.22        | 0.21        | 0.23        | 0.77        | 1.75        | 0.29        | 0.31        |
| <b>Ave.</b> | <b>1.00</b> | <b>2.53</b> | <b>2.04</b> | <b>0.69</b> | <b>0.75</b> | <b>2.88</b> | <b>1.09</b> | <b>1.07</b> |

***Spo11***

|             | D2          |             |             |             | D3           |              |             |             |
|-------------|-------------|-------------|-------------|-------------|--------------|--------------|-------------|-------------|
|             | Ctrl        | RA          | RA+U0126    | U0126       | Ctrl         | RA           | RA+U0126    | U0126       |
| 1           | 0.27        | 4.26        | 7.22        | 1.69        | 1.92         | 28.51        | 5.91        | 0.31        |
| 2           | 1.89        | 16.10       | 11.04       | 1.42        | 11.86        | 24.87        | 0.00        | 4.97        |
| 3           | 0.84        | 1.76        | 3.41        | 1.83        | 18.11        | 38.33        | 0.00        | 0.93        |
| <b>Ave.</b> | <b>1.00</b> | <b>7.37</b> | <b>7.22</b> | <b>1.65</b> | <b>10.63</b> | <b>30.57</b> | <b>1.97</b> | <b>2.07</b> |

***Dmc1***

|             | D2          |             |             |             | D3          |             |             |             |
|-------------|-------------|-------------|-------------|-------------|-------------|-------------|-------------|-------------|
|             | Ctrl        | RA          | RA+U0126    | U0126       | Ctrl        | RA          | RA+U0126    | U0126       |
| 1           | 0.85        | 0.80        | 0.00        | 0.00        | 1.95        | 4.47        | 0.00        | 0.15        |
| 2           | 1.33        | 2.81        | 2.31        | 0.69        | 1.97        | 9.37        | 2.10        | 0.25        |
| 3           | 0.82        | 0.76        | 1.99        | 0.00        | 1.65        | 7.79        | 1.00        | 0.35        |
| <b>Ave.</b> | <b>1.00</b> | <b>1.46</b> | <b>1.43</b> | <b>0.23</b> | <b>1.86</b> | <b>7.21</b> | <b>1.03</b> | <b>0.25</b> |

***Sycp3***

|             | D2          |             |             |             | D3          |             |             |             |
|-------------|-------------|-------------|-------------|-------------|-------------|-------------|-------------|-------------|
|             | Ctrl        | RA          | RA+U0126    | U0126       | Ctrl        | RA          | RA+U0126    | U0126       |
| 1           | 0.66        | 1.06        | 1.32        | 0.77        | 0.71        | 1.89        | 0.61        | 0.53        |
| 2           | 1.46        | 1.28        | 0.67        | 0.73        | 0.85        | 2.44        | 0.69        | 0.49        |
| 3           | 0.88        | 1.78        | 0.06        | 0.36        | 0.93        | 2.56        | 1.04        | 0.12        |
| <b>Ave.</b> | <b>1.00</b> | <b>1.37</b> | <b>0.68</b> | <b>0.62</b> | <b>0.83</b> | <b>2.30</b> | <b>0.78</b> | <b>0.38</b> |
