# Supplementary material for: Retinoic acid-stimulated ERK1/2 pathway regulates meiotic initiation in cultured fetal germ cells
Source: PubMed Central journal article supplement (PMC6827903; doi:10.1371/journal.pone.0224628), 2019-11-04
Supplement: pone.0224628.s010.pdf [file pone.0224628.s010.pdf]

## Supplemental Information S10\_Fig. 6B

E13.5 XY PGCs (48 h)

| 1st      | Hoechst | STRA8-positive | STRA8-negative | % of STRA8-positive cells | % of STRA8-negative cells |
|----------|---------|----------------|----------------|---------------------------|---------------------------|
| Control  | 54      | 0              | 54             | 0.0                       | 100.0                     |
| RA       | 70      | 53             | 17             | 75.7                      | 24.3                      |
| RA+U0126 | 94      | 16             | 78             | 17.0                      | 83.0                      |
| U0126    | 85      | 0              | 85             | 0.0                       | 100.0                     |

| 2nd      | Hoechst | STRA8-positive | STRA8-negative | % of STRA8-positive cells | % of STRA8-negative cells |
|----------|---------|----------------|----------------|---------------------------|---------------------------|
| Control  | 108     | 0              | 108            | 0.0                       | 100.0                     |
| RA       | 142     | 106            | 36             | 74.6                      | 25.4                      |
| RA+U0126 | 180     | 32             | 148            | 17.8                      | 82.2                      |
| U0126    | 162     | 5              | 157            | 3.1                       | 96.9                      |

| 3rd      | Hoechst | STRA8-positive | STRA8-negative | % of STRA8-positive cells | % of STRA8-negative cells |
|----------|---------|----------------|----------------|---------------------------|---------------------------|
| Control  | 111     | 0              | 111            | 0.0                       | 100.0                     |
| RA       | 209     | 151            | 58             | 72.2                      | 27.8                      |
| RA+U0126 | 176     | 36             | 140            | 20.5                      | 79.5                      |
| U0126    | 157     | 6              | 151            | 3.8                       | 96.2                      |

| Total    | Hoechst | STRA8-positive | STRA8-negative | % of STRA8-positive cells | % of STRA8-negative cells |
|----------|---------|----------------|----------------|---------------------------|---------------------------|
| Control  | 273     | 0              | 273            | 0.0                       | 100.0                     |
| RA       | 421     | 310            | 111            | 73.6                      | 26.4                      |
| RA+U0126 | 450     | 84             | 366            | 18.7                      | 81.3                      |
| U0126    | 404     | 11             | 393            | 2.7                       | 97.3                      |
