# Supplementary material for: Retinoic acid-stimulated ERK1/2 pathway regulates meiotic initiation in cultured fetal germ cells
Source: PubMed Central journal article supplement (PMC6827903; doi:10.1371/journal.pone.0224628), 2019-11-04
Supplement: pone.0224628.s011.pdf [file pone.0224628.s011.pdf]

## Supplemental Information S11\_Fig. 6D

E13.5 XY PGCs (48 h)

| 1st      | Hoechst | $\gamma$ H2AX-positive | $\gamma$ H2AX-negative | % of $\gamma$ H2AX-positive cells | % of $\gamma$ H2AX-negative cells |
|----------|---------|------------------------|------------------------|-----------------------------------|-----------------------------------|
| Control  | 75      | 2                      | 73                     | 2.7                               | 97.3                              |
| RA       | 40      | 15                     | 25                     | 37.5                              | 62.5                              |
| RA+U0126 | 130     | 6                      | 124                    | 4.6                               | 95.4                              |
| U0126    | 74      | 4                      | 70                     | 5.4                               | 94.6                              |

| 2nd      | Hoechst | $\gamma$ H2AX-positive | $\gamma$ H2AX-negative | % of $\gamma$ H2AX-positive cells | % of $\gamma$ H2AX-negative cells |
|----------|---------|------------------------|------------------------|-----------------------------------|-----------------------------------|
| Control  | 176     | 3                      | 173                    | 1.7                               | 98.3                              |
| RA       | 31      | 9                      | 22                     | 29.0                              | 71.0                              |
| RA+U0126 | 80      | 4                      | 76                     | 5.0                               | 95.0                              |
| U0126    | 72      | 2                      | 70                     | 2.8                               | 97.2                              |

| 3rd      | Hoechst | $\gamma$ H2AX-positive | $\gamma$ H2AX-negative | % of $\gamma$ H2AX-positive cells | % of $\gamma$ H2AX-negative cells |
|----------|---------|------------------------|------------------------|-----------------------------------|-----------------------------------|
| Control  | 86      | 2                      | 84                     | 2.3                               | 97.7                              |
| RA       | 98      | 42                     | 56                     | 42.9                              | 57.1                              |
| RA+U0126 | 124     | 9                      | 115                    | 7.3                               | 92.7                              |
| U0126    | 143     | 3                      | 140                    | 2.1                               | 97.9                              |

| Total    | Hoechst | $\gamma$ H2AX-positive | $\gamma$ H2AX-negative | % of $\gamma$ H2AX-positive cells | % of $\gamma$ H2AX-negative cells |
|----------|---------|------------------------|------------------------|-----------------------------------|-----------------------------------|
| Control  | 337     | 7                      | 330                    | 2.1                               | 97.9                              |
| RA       | 169     | 66                     | 103                    | 39.1                              | 60.9                              |
| RA+U0126 | 334     | 19                     | 315                    | 5.7                               | 94.3                              |
| U0126    | 289     | 9                      | 280                    | 3.1                               | 96.9                              |
