# Supplementary material for: Retinoic acid-stimulated ERK1/2 pathway regulates meiotic initiation in cultured fetal germ cells
Source: PubMed Central journal article supplement (PMC6827903; doi:10.1371/journal.pone.0224628), 2019-11-04
Supplement: pone.0224628.s012.pdf [file pone.0224628.s012.pdf]

## S12 Table\_S2 Fig. A

E12.5 XX gonads (24 & 48h)

### *Mvh*

|             | D1          |             | D2          |             |
|-------------|-------------|-------------|-------------|-------------|
|             | Control     | U0126       | Control     | U0126       |
| <b>1</b>    | 1.12        | 1.22        | 1.39        | 1.12        |
| <b>2</b>    | 1.01        | 0.89        | 1.06        | 1.45        |
| <b>3</b>    | 0.87        | 1.26        | 2.45        | 1.57        |
| <b>Ave.</b> | <b>1.00</b> | <b>1.12</b> | <b>1.63</b> | <b>1.38</b> |
