# Supplementary material for: Retinoic acid-stimulated ERK1/2 pathway regulates meiotic initiation in cultured fetal germ cells
Source: PubMed Central journal article supplement (PMC6827903; doi:10.1371/journal.pone.0224628), 2019-11-04
Supplement: pone.0224628.s013.pdf [file pone.0224628.s013.pdf]

**S13 Table\_S2 Fig. B**

E12.5 XX germ cells (24 &amp; 48h)

**Mvh**

|            | D1          |             |             |             | D2          |             |             |             |
|------------|-------------|-------------|-------------|-------------|-------------|-------------|-------------|-------------|
|            | Ctrl        | RA          | RA+U0126    | U0126       | Ctrl        | RA          | RA+U0126    | U0126       |
| 1          | 0.33        | 1.25        | 0.83        | 0.72        | 2.41        | 2.12        | 1.06        | 0.81        |
| 2          | 1.63        | 1.22        | 1.02        | 0.81        | 1.12        | 0.79        | 0.65        | 0.41        |
| 3          | 0.08        | 0.32        |             | 0.71        |             |             |             |             |
| 4          | 1.96        | 0.81        | 0.93        | 0.84        | 2.66        | 2.85        | 0.80        | 0.89        |
| <b>Ave</b> | <b>1.00</b> | <b>0.90</b> | <b>0.93</b> | <b>0.77</b> | <b>2.06</b> | <b>1.92</b> | <b>0.84</b> | <b>0.70</b> |
