# Supplementary material for: Retinoic acid-stimulated ERK1/2 pathway regulates meiotic initiation in cultured fetal germ cells
Source: PubMed Central journal article supplement (PMC6827903; doi:10.1371/journal.pone.0224628), 2019-11-04
Supplement: pone.0224628.s014.pdf [file pone.0224628.s014.pdf]

**S14 Table\_S3 Fig.**

E13.5 XY germ cells (48 &amp; 72h)

**Mvh**

|            | <b>D2</b>   |             |                 |              | <b>D3</b>   |             |                 |              |
|------------|-------------|-------------|-----------------|--------------|-------------|-------------|-----------------|--------------|
|            | <b>Ctrl</b> | <b>RA</b>   | <b>RA+U0126</b> | <b>U0126</b> | <b>Ctrl</b> | <b>RA</b>   | <b>RA+U0126</b> | <b>U0126</b> |
| <b>1</b>   | 0.42        | 0.77        | 1.19            | 0.83         | 0.94        | 1.28        | 0.86            | 0.65         |
| <b>2</b>   | 0.76        | 0.93        | 0.83            | 0.91         | 0.95        | 1.45        | 0.65            | 0.61         |
| <b>3</b>   | 2.28        | 1.41        | 1.55            | 1.22         |             |             |                 |              |
| <b>4</b>   | 0.55        | 1.12        | 1.34            | 0.85         | 1.64        | 2.10        | 1.03            | 0.78         |
| <b>Ave</b> | <b>1.00</b> | <b>1.06</b> | <b>1.23</b>     | <b>0.95</b>  | <b>1.18</b> | <b>1.61</b> | <b>0.85</b>     | <b>0.68</b>  |
