# Supplementary material for: Retinoic acid-stimulated ERK1/2 pathway regulates meiotic initiation in cultured fetal germ cells
Source: PubMed Central journal article supplement (PMC6827903; doi:10.1371/journal.pone.0224628), 2019-11-04
Supplement: pone.0224628.s015.pdf [file pone.0224628.s015.pdf]

S15 Table\_O.D. for Westren blot

**Fig. 1B**

p-ERK1/2

|     | 0h   | 0.5h | 1h   | 2h    |
|-----|------|------|------|-------|
| 1   | 2828 | 4404 | 7835 | 22888 |
| 2   | 1828 | 3458 | 6855 | 19288 |
| Ave | 2328 | 3931 | 7345 | 21088 |
| SD  | 707  | 669  | 693  | 2546  |

p-P38

|     | 0h    | 0.5h  | 1h    | 2h    |
|-----|-------|-------|-------|-------|
| 1   | 24738 | 12968 | 13385 | 18268 |
| 2   | 10738 | 6968  | 7385  | 9268  |
| Ave | 17738 | 9968  | 10385 | 13768 |
| SD  | 9899  | 4243  | 4243  | 6364  |

**Fig. 2B**

STRA8

|     | Control | RA    | RA+U0126 | U0126 |
|-----|---------|-------|----------|-------|
| 1   | 910     | 30966 | 6242     | 859   |
| 2   | 752     | 25476 | 3522     | 255   |
| Ave | 831     | 28221 | 4882     | 557   |
| SD  | 112     | 3882  | 1923     | 427   |

p-ERK1/2

|     | Control | RA    | RA+U0126 | U0126 |
|-----|---------|-------|----------|-------|
| 1   | 1804    | 31479 | 2690     | 1108  |
| 2   | 2914    | 24529 | 2050     | 568   |
| Ave | 2359    | 28004 | 2370     | 838   |
| SD  | 785     | 4914  | 453      | 382   |

**Fig. 5A**

STRA8

|     | 0h   | 12h   | 24h   | 48h    |
|-----|------|-------|-------|--------|
| 1   | 3911 | 26409 | 48064 | 134453 |
| 2   | 1452 | 2253  | 8523  | 94285  |
| Ave | 2682 | 14331 | 28294 | 114369 |
| SD  | 1739 | 17081 | 27960 | 28403  |

p-ERK1/2

|     | 0h   | 12h   | 24h   | 48h    |
|-----|------|-------|-------|--------|
| 1   | 7219 | 18636 | 31181 | 121719 |
| 2   | 5222 | 13020 | 22332 | 62355  |
| Ave | 6221 | 15828 | 26757 | 92037  |
| SD  | 1412 | 3971  | 6257  | 41977  |

**Fig. 5B**

STRA8

|     | Control | RA    | RA+U0126 | U0126 |
|-----|---------|-------|----------|-------|
| 1   | 0       | 32777 | 2751     | 0     |
| 2   | 0       | 12777 | 751      | 0     |
| Ave | 0       | 22777 | 1751     | 0     |
| SD  | 0       | 14142 | 1414     | 0     |

p-ERK1/2

|     | Control | RA    | RA+U0126 | U0126 |
|-----|---------|-------|----------|-------|
| 1   | 0       | 37024 | 0        | 0     |
| 2   | 0       | 17454 | 0        | 0     |
| Ave | 0       | 27239 | 0        | 0     |
| SD  | 0       | 13838 | 0        | 0     |

**S1 Fig.**

p-ERK1/2

|   | 0 $\mu$ M | 10 $\mu$ M | 20 $\mu$ M | 50 $\mu$ M |
|---|-----------|------------|------------|------------|
| 1 | 29287     | 23427      | 22428      | 6006       |
