# Supplementary material for: Retinoic acid-stimulated ERK1/2 pathway regulates meiotic initiation in cultured fetal germ cells
Source: PubMed Central journal article supplement (PMC6827903; doi:10.1371/journal.pone.0224628), 2019-11-04

**S2 Fig. A**

**E12.5 XX germ cells in cultured gonads (24 & 48h)**

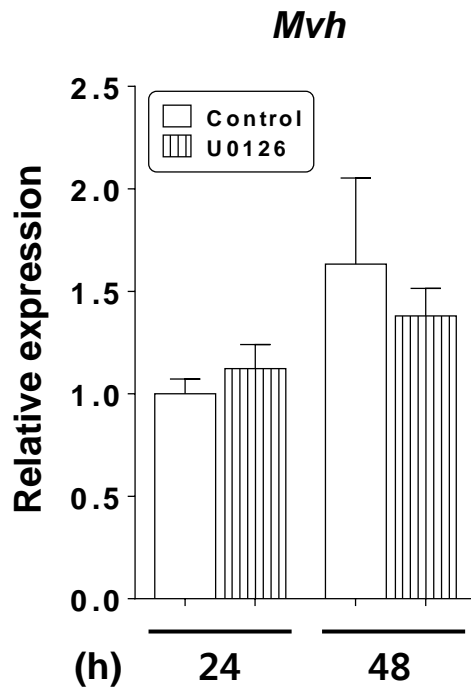

**B**

**E12.5 XX germ cells (24 & 48h)**

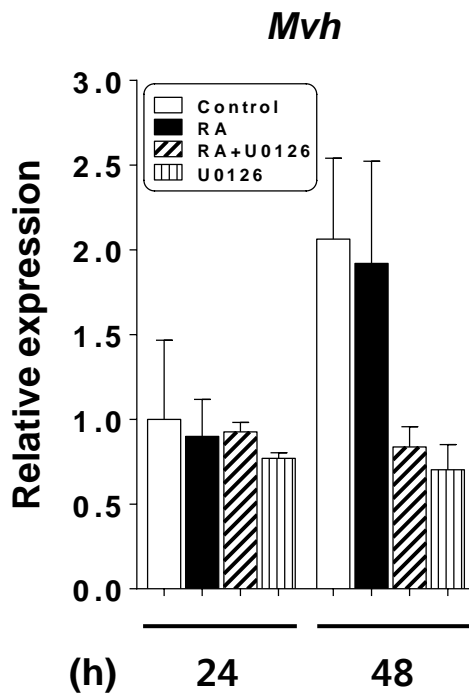

Supplement: pone.0224628.s017.pdf [file pone.0224628.s017.pdf]
