# Supplementary material for: Retinoic acid-stimulated ERK1/2 pathway regulates meiotic initiation in cultured fetal germ cells
Source: PubMed Central journal article supplement (PMC6827903; doi:10.1371/journal.pone.0224628), 2019-11-04

**S3 Fig.**

**E13.5 XY germ cells (48 & 72h)**

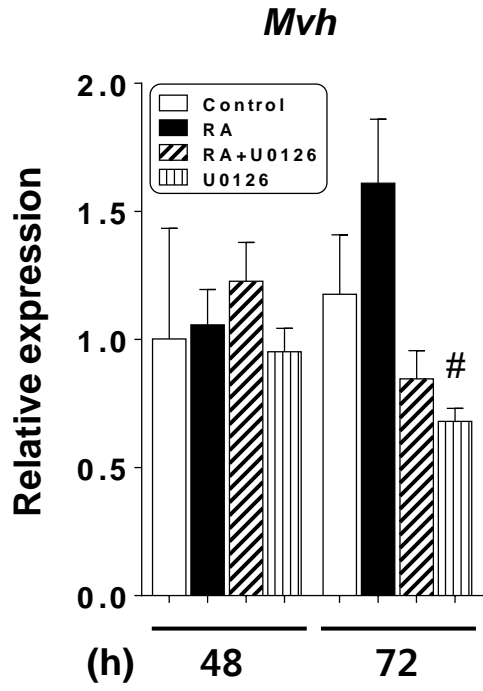

Supplement: pone.0224628.s018.pdf [file pone.0224628.s018.pdf]
